# Supplementary material
Source: Springer Nature journal article supplement (https://www.springermedizin.de/resource/supplementary/12971_2013_153_MOESM4_ESM.pdf/9595086)

### Proportion of students (%)

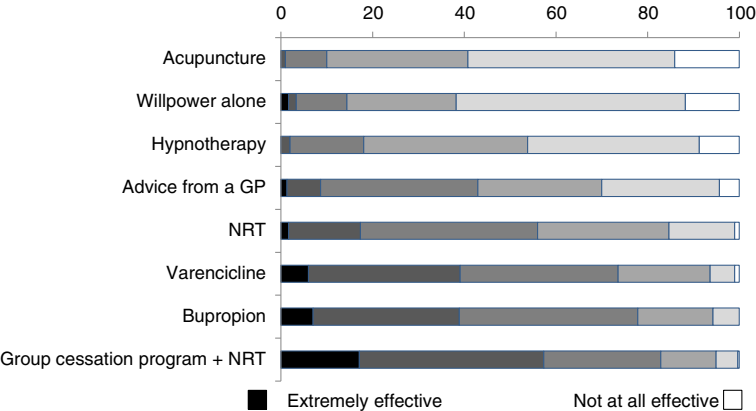

Supplement: MOESM4 [file 9595086]
